# Supplementary material
Source: publisher figshare collection journal article supplement (https://acs.figshare.com/ndownloader/files/4623946)
Supplement: Supplementary file 1 [file 4623946]

## SUPPORTING INFORMATION

Influence of Amphiphilic Block Copolymer Induced Changes in Membrane Ion Conductance  
on the Reversal of Multidrug Resistance

*Klaus Sommer, Sergej Kaiser, Oxana O. Krylova, Jörg Kressler, Peter Pohl and Karsten  
Busse*

## TABLE OF CONTENTS

|            |   |
|------------|---|
| Figure S1  | 2 |
| Figure S2  | 3 |
| Figure S3  | 4 |
| References | 4 |

Figure S1 shows the  $^{19}\text{F}$  NMR spectrum of PHFPO dicarboxylic acid with molar mass of 1500 g/mol.

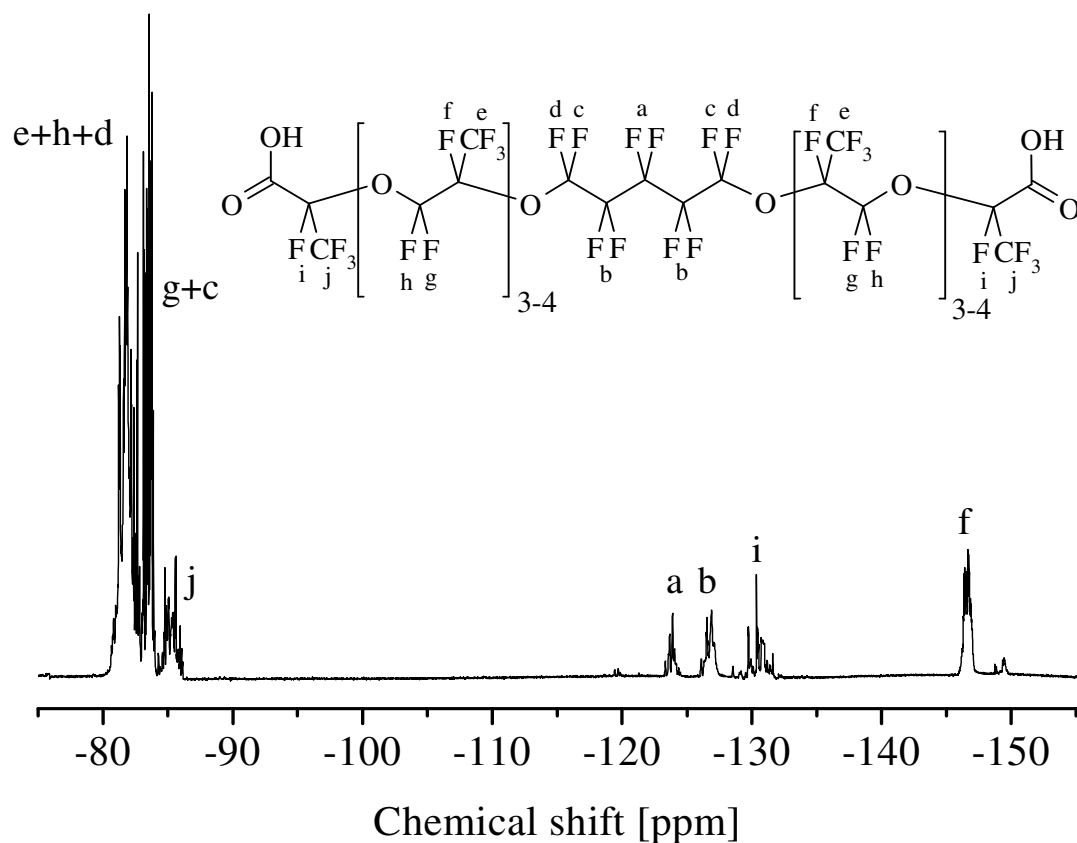

The 2F and 4F signals of the middle (a) and the two neighbouring (b)  $\text{CF}_2$  groups from the initiator can be seen at -124 and -127 ppm, respectively. The signals of additional  $\text{CF}_2$  groups (d and c) are located in the 35F multiplet between -81 and -83 ppm. This signal comes also from the fluoromethyl group (e) and the fluoromethylene groups (g and h) of the PFHPO chain. The 7F signal of the CF groups (f) which belong to the PHFPO chain are in the range of -147 ppm. Additionally, the 6F signal of the fluoromethylene groups neighboring the carboxylic acid groups (j) at -85 ppm and the 2F signals of the CF groups (i) at -130 ppm can be identified.

Figure S2:  $^1\text{H}$ -NMR spectrum of PEO-b-PHFPO-b-PEO dissolved in  $\text{d}^6$ -DMSO. The inset shows the respective  $^{19}\text{F}$ -NMR spectrum.

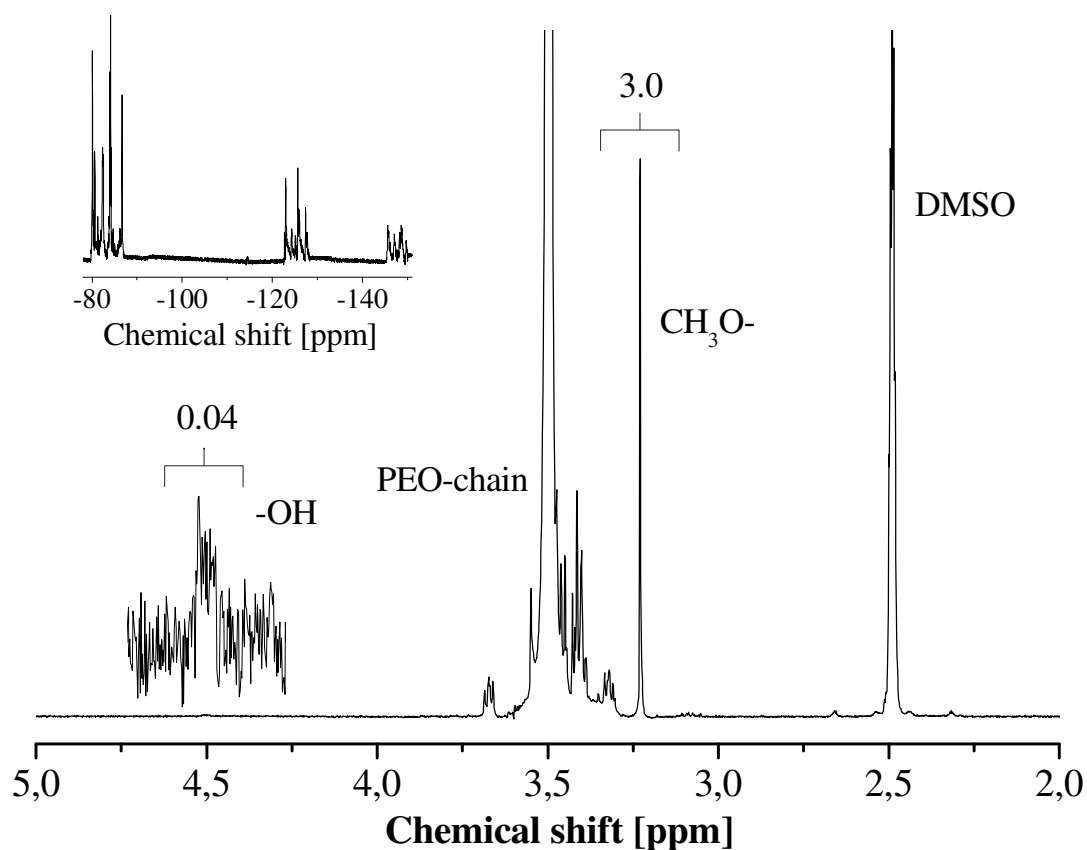

The  $^1\text{H}$  NMR spectra taken in  $\text{d}^6$ -DMSO show the signals of the PEO chain between 3.3 and 3.6 ppm, which would also appear in non-converted PEO-MME. The triplet of the OH-protons of PEO-MME endgroup appears at 4.56 ppm and is drastically reduced. From the ratio of the integral of this peak and the integral of the 3H signal of methoxy protons at 3.24 ppm the conversion of PEO-MME to the respective block copolymers can be calculated<sup>1</sup>. For the NMR spectrum under discussion the conversion is 96 %. The inset shows the respective  $^{19}\text{F}$ -NMR spectrum in  $\text{d}^6$ -DMSO. A nearly complete disappearance of the signal at -130 ppm can be observed which belongs to the free PHFPO dicarboxylic acid (CF groups next to carboxylic acids groups, see discussion of Figure S1).

Figure S3. Normalized Radii distribution obtained by CONTIN fitting to Dynamic light scattering data of PEO-b-PHFPO-b-PEO in water using a polymer concentration of 1 wt.-%.

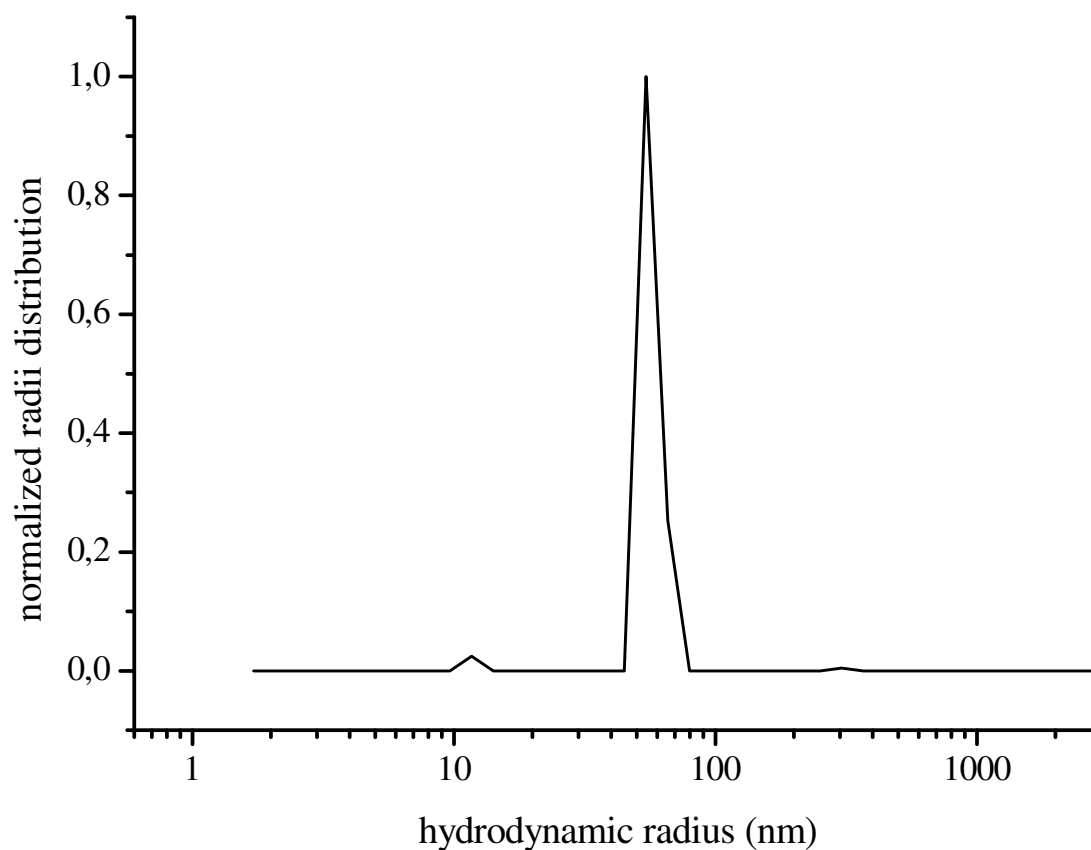

Due to the amphiphilic character of the block copolymers under investigation it was expected to find micellization in water where the hydrophobic perfluorinated blocks form the core and the corona is formed by PEO blocks.

#### REFERENCES

- (1) Dust, J. M.; Fang, Z. H.; Harris, J. M. Proton Nmr Characterization of Poly(Ethylene Glycols) and Derivatives. *Macromolecules* **1990**, 23 (16), 3742-3746.
